# Supplementary material for: Se deficiency induces renal pathological changes by regulating selenoprotein expression, disrupting redox balance, and activating inflammation
Source: Royal Society of Chemistry journal article supplement (doi:10.1039/d0mt00165a), 2020-09-01
Supplement: d0mt00165a1.pdf [file d0mt00165a1.pdf]

Supplemental Table 1. Ingredient and nutrient composition of the basal diet for pigs

| Item                         | Starter (weight < 25 kg <sup>a</sup> ) | Grower (weight > 25 kg <sup>b</sup> ) |
|------------------------------|----------------------------------------|---------------------------------------|
| Ingredients, %               |                                        |                                       |
| Maize                        | 66                                     | 74.7                                  |
| Soybean meal                 | 26.2                                   | 20                                    |
| Soybean oil                  | 3.6                                    | 1.6                                   |
| Sodium chloride              | 0.5                                    | 0.3                                   |
| Limestone                    | 0.9                                    | 0.9                                   |
| Dicalcium phosphate          | 1                                      | 0.9                                   |
| Lysine (%)                   | 0.8                                    | 0.6                                   |
| Premix <sup>1</sup>          | 1                                      | 1                                     |
| Digestible energy (Kcal /kg) | 3493.28                                | 3405.15                               |
| Crude protein (%)            | 15.88                                  | 14.17                                 |
| Calcium (%)                  | 0.71                                   | 0.67                                  |
| available phosphorus (%)     | 0.29                                   | 0.27                                  |
| Lysine (%)                   | 1.23                                   | 0.98                                  |
| Methionine (%)               | 0.36                                   | 0.28                                  |
| Threonine (%)                | 0.73                                   | 0.59                                  |
| Tryptophan                   | 0.20                                   | 0.17                                  |

<sup>1</sup> Premix provided (per kg feed): Cu (5 mg <sup>a</sup>, 4 mg <sup>b</sup>), I (0.14 mg <sup>a,b</sup>), Fe (100 mg <sup>a</sup>, 60 mg <sup>b</sup>), Mn (3 mg <sup>a</sup>, 2 mg <sup>b</sup>), Zn (80 mg <sup>a</sup>, 60 mg <sup>b</sup>), vitamin A (1750 IU <sup>a</sup>, 1300 IU <sup>b</sup>), vitamin D<sub>3</sub> (200 IU <sup>a</sup>, 150 IU <sup>b</sup>), vitamin E (11 IU <sup>a,b</sup>), vitamin K<sub>3</sub> (0.5 mg <sup>a,b</sup>), biotin (0.05 mg <sup>a,b</sup>), choline (0.4 g <sup>a</sup>, 0.3 g <sup>b</sup>), folic acid (0.3 mg <sup>a,b</sup>), niacin (30 mg <sup>a,b</sup>), d-pantothenic acid (9 mg <sup>a</sup>, 8 mg <sup>b</sup>), vitamin B<sub>1</sub> (1 mg <sup>a,b</sup>), vitamin B<sub>2</sub> (3 mg <sup>a</sup>, 2.5 mg <sup>b</sup>), vitamin B<sub>6</sub> (3 mg <sup>a</sup>, 1 mg <sup>b</sup>), vitamin B<sub>12</sub> (15 µg <sup>a</sup>, 10 µg <sup>b</sup>).
