# Supplementary material for: Se deficiency induces renal pathological changes by regulating selenoprotein expression, disrupting redox balance, and activating inflammation
Source: Royal Society of Chemistry journal article supplement (doi:10.1039/d0mt00165a), 2020-09-01
Supplement: d0mt00165a2.pdf [file d0mt00165a2.pdf]

Supplemental Table 2. List of primers used for selenoprotein gene Real-Time PCR analysis

| Gene <sup>1</sup> | 5' to 3'                                                                   | Accession NO. |
|-------------------|----------------------------------------------------------------------------|---------------|
| <i>GPXI</i>       | Forward: GATGCCACTGCCCTCATGA<br>Reverse: TCGAAGTTCCATGCGATGTC              | AF532927      |
| <i>GPX3</i>       | Forward: TGCACTGCAGGAAGAGTTTGAA<br>Reverse: CCGGTTCCCTGTTTTCCAAATT         | AY368622      |
| <i>GPX4</i>       | Forward: TGAGGCAAGACGGAGGTAAACT<br>Reverse: TCCGTAAACCACTCAGCATATC         | NM_214407     |
| <i>TXNRD1</i>     | Forward: GATTTAACAAGCGGGTCATGGT<br>Reverse: CAACCTACATTCACACACGTTCCCT      | AF537300      |
| <i>TXNRD2</i>     | Forward: TCTTGAAAGGCGGAAAAGAGAT<br>Reverse: TCGGTCGCCCTCCAGTAG             | GU181287      |
| <i>SELENOF</i>    | Forward: ACAGCCCTGCCAAGCAGAT<br>Reverse: AACAGGGAGGCTGGGTAACAC             | EF178474      |
| <i>SELENOP</i>    | Forward: AACCAGAAGCGCCAGACACT<br>Reverse: TGCTGGCATATCTCAGTTCTCAGA         | EF113596      |
| <i>SELENOT</i>    | Forward: GGCTTAATAATCGTTGGCAAAGA<br>Reverse: TGGCCCCATTGCCAGATA            | GQ140624      |
| <i>SELENOW</i>    | Forward: CACCCCTGTCTCCCTGCAT<br>Reverse: GAGCAGGATCACCCCAAACA              | AF380118      |
| <i>SELENOS</i>    | Forward: GAGGCAGAGGCACCTGGAT<br>Reverse: CTGCTAAAGCCTCCTGTCGTTT            | AY609646      |
| <i>SELENON</i>    | Forward: ACCTGGTCCCTGGTGAAAGAG<br>Reverse: AGGCCAGCCAGCTTCTTGT             | EF113595.2    |
| <i>SELENOK</i>    | Forward: CAGGAAACCCCCCTAGAAGAA<br>Reverse: CTCATCCACCGGCCATTG              | DQ372075      |
| <i>SELENOH</i>    | Forward: TGGTGGAGGAGCTGAAGAAGTAC<br>Reverse: CGTCATAAATGCTCCAACATCAC       | HM018602      |
| <i>SELENOI</i>    | Forward: GATGGTGTGGATGAAAAGCAA<br>Reverse: GCCATGGTCAAAGAGTTCTCCTA         | AK347874      |
| <i>SEPHS2</i>     | Forward: TGGCTTGATGCACACGTTTAA<br>Reverse: TGCGAGTGTCCCAGAATGC             | EF033624      |
| <i>SELENOO</i>    | Forward: CTTCCGACCCAGATGGAT<br>Reverse: GGTTCGACTGTGCCAGCAT                | AK236851      |
| <i>SELENOM</i>    | Forward: CAGCTGAATCGCCTCAAAGAG<br>Reverse: GAGATGTTTCATGACCAGGTTGTG        | FJ968780      |
| <i>SELENOR</i>    | Forward: ATCCCTAAAGGCCAAGAATCATC<br>Reverse: GGCCACCAAGCAGTGTTC            | EF113597      |
| <i>GAPDH</i>      | Forward: GGAAGAGTGAGTGTCACTGTTGAAGT<br>Reverse: GAGAAACCTGCAAAATATGATGACAT | AF017079      |

<sup>1</sup>Abbreviation: *GPX*, glutathione peroxidase; *TXNRD*, thioredoxin reductase; *SELENOF*, selenoprotein F; *SELENOP*, selenoprotein P; *SELENOT*, selenoprotein T; *SELENOW*, selenoprotein W; *SELENOS*, selenoprotein S; *SELENON*, selenoprotein N; *SELENOK*, selenoprotein K; *SELENOH*, selenoprotein H;

*SELENOI*, selenoprotein I; *SEPHS2*, selenophosphate synthetase 2; *SELENOO*, selenoprotein O; *SELENOM*, selenoprotein M; *SELENOR*, selenoprotein R.
